# Supplementary material for: Dietary Marine Oils Selectively Decrease Obesogenic Diet-Derived Carbonylation in Proteins Involved in ATP Homeostasis and Glutamate Metabolism in the Rat Cerebellum
Source: MDPI journal article supplement (doi:10.3390/antiox13010103), 2024-01-15
Supplement: s1 [file s1]

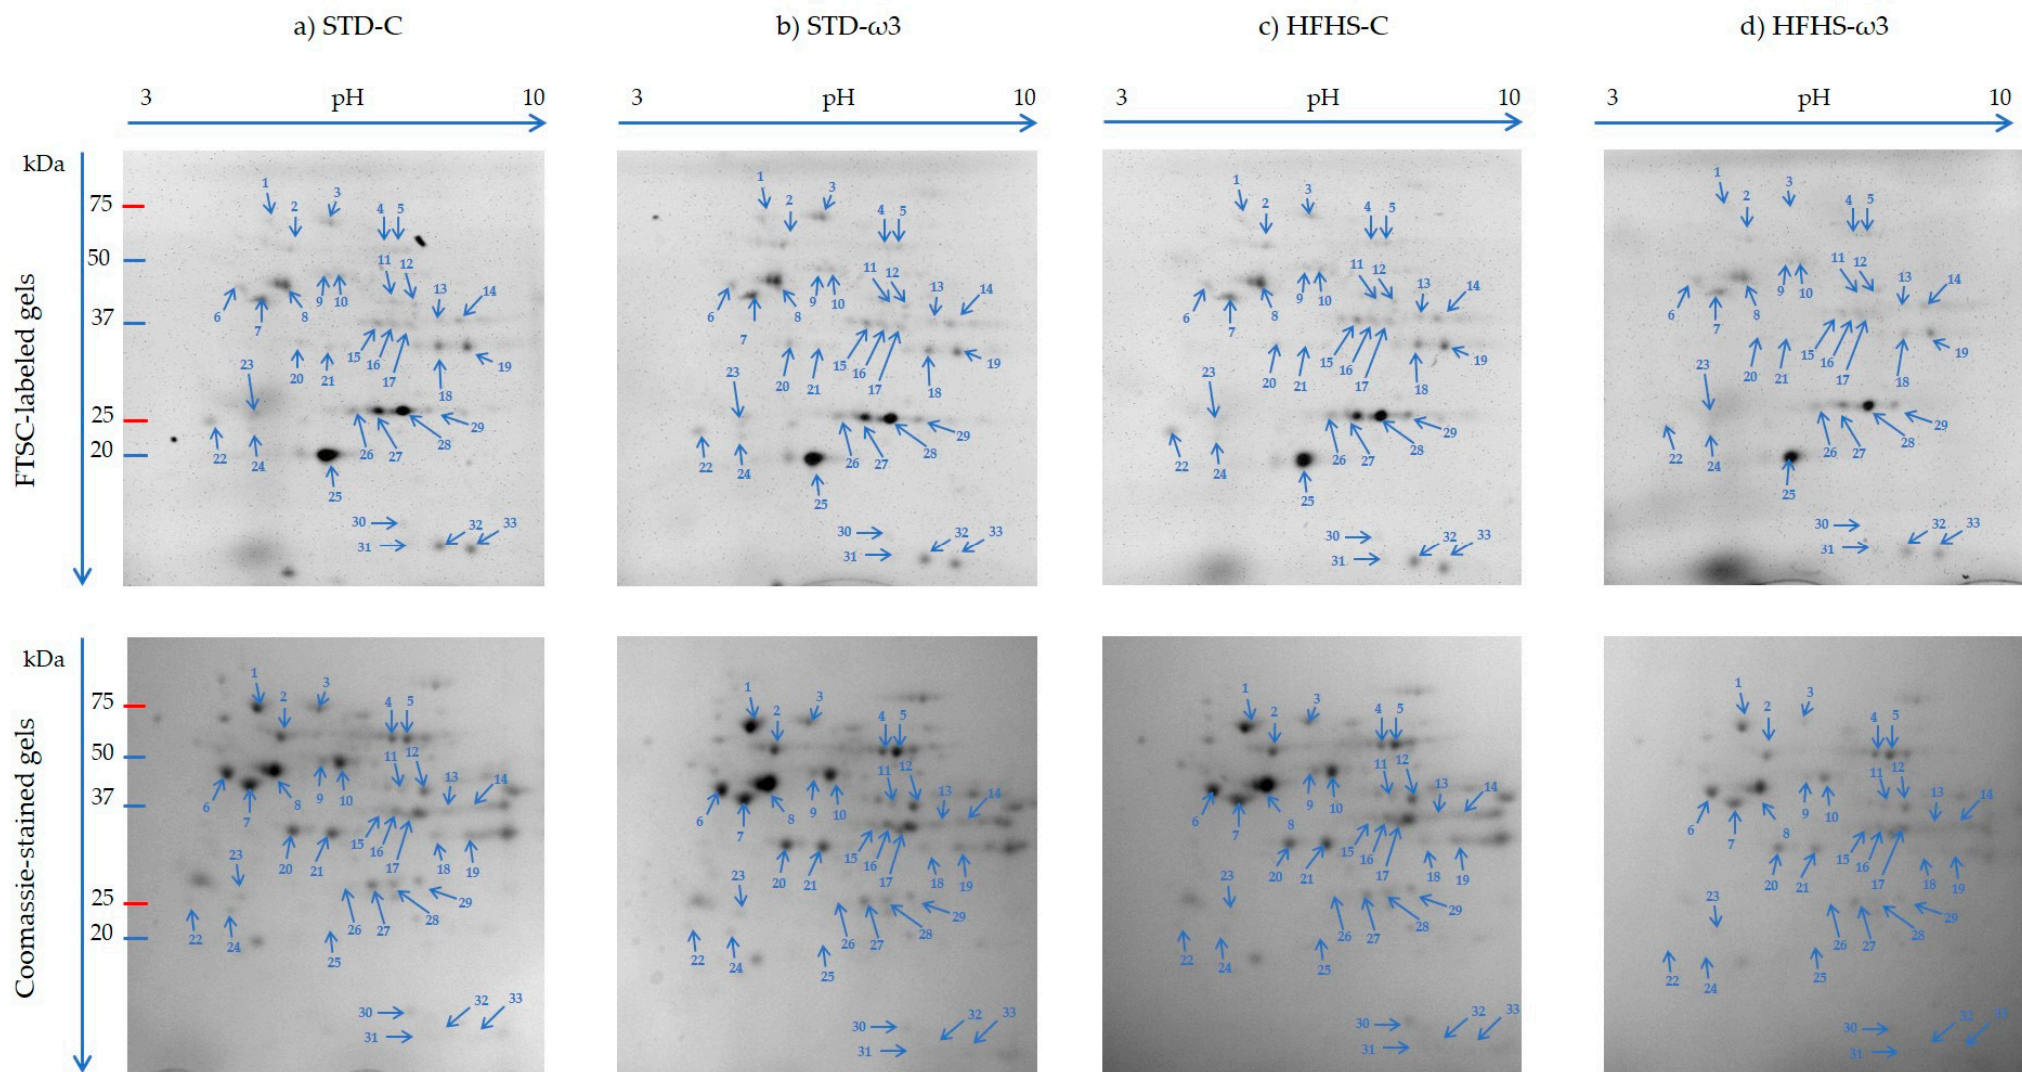

**Supplementary Figure S1:** Representative 2-DE gel images showing carbonylated and total proteins identified in the cytosolic fraction of rat cerebellum. Upper panels are the FTSC-labeled 2-DE gel images and bottom panels are the corresponding Coomassie-stained 2-DE gel images from a) STD-C, b) STD- $\omega$ 3, c) HFHS-C and d) HFHS- $\omega$ 3 experimental groups. Numbered protein spots (1-33) indicate carbonylated proteins confidently identified and listed in Supplementary Table S4. Images are representatives of three independent labeling experiments performed in triplicates. STD: standard diet. HFHS: high-fat and high-sucrose diet; C: control oil (soybean oil),  $\omega$ 3: fish oil.

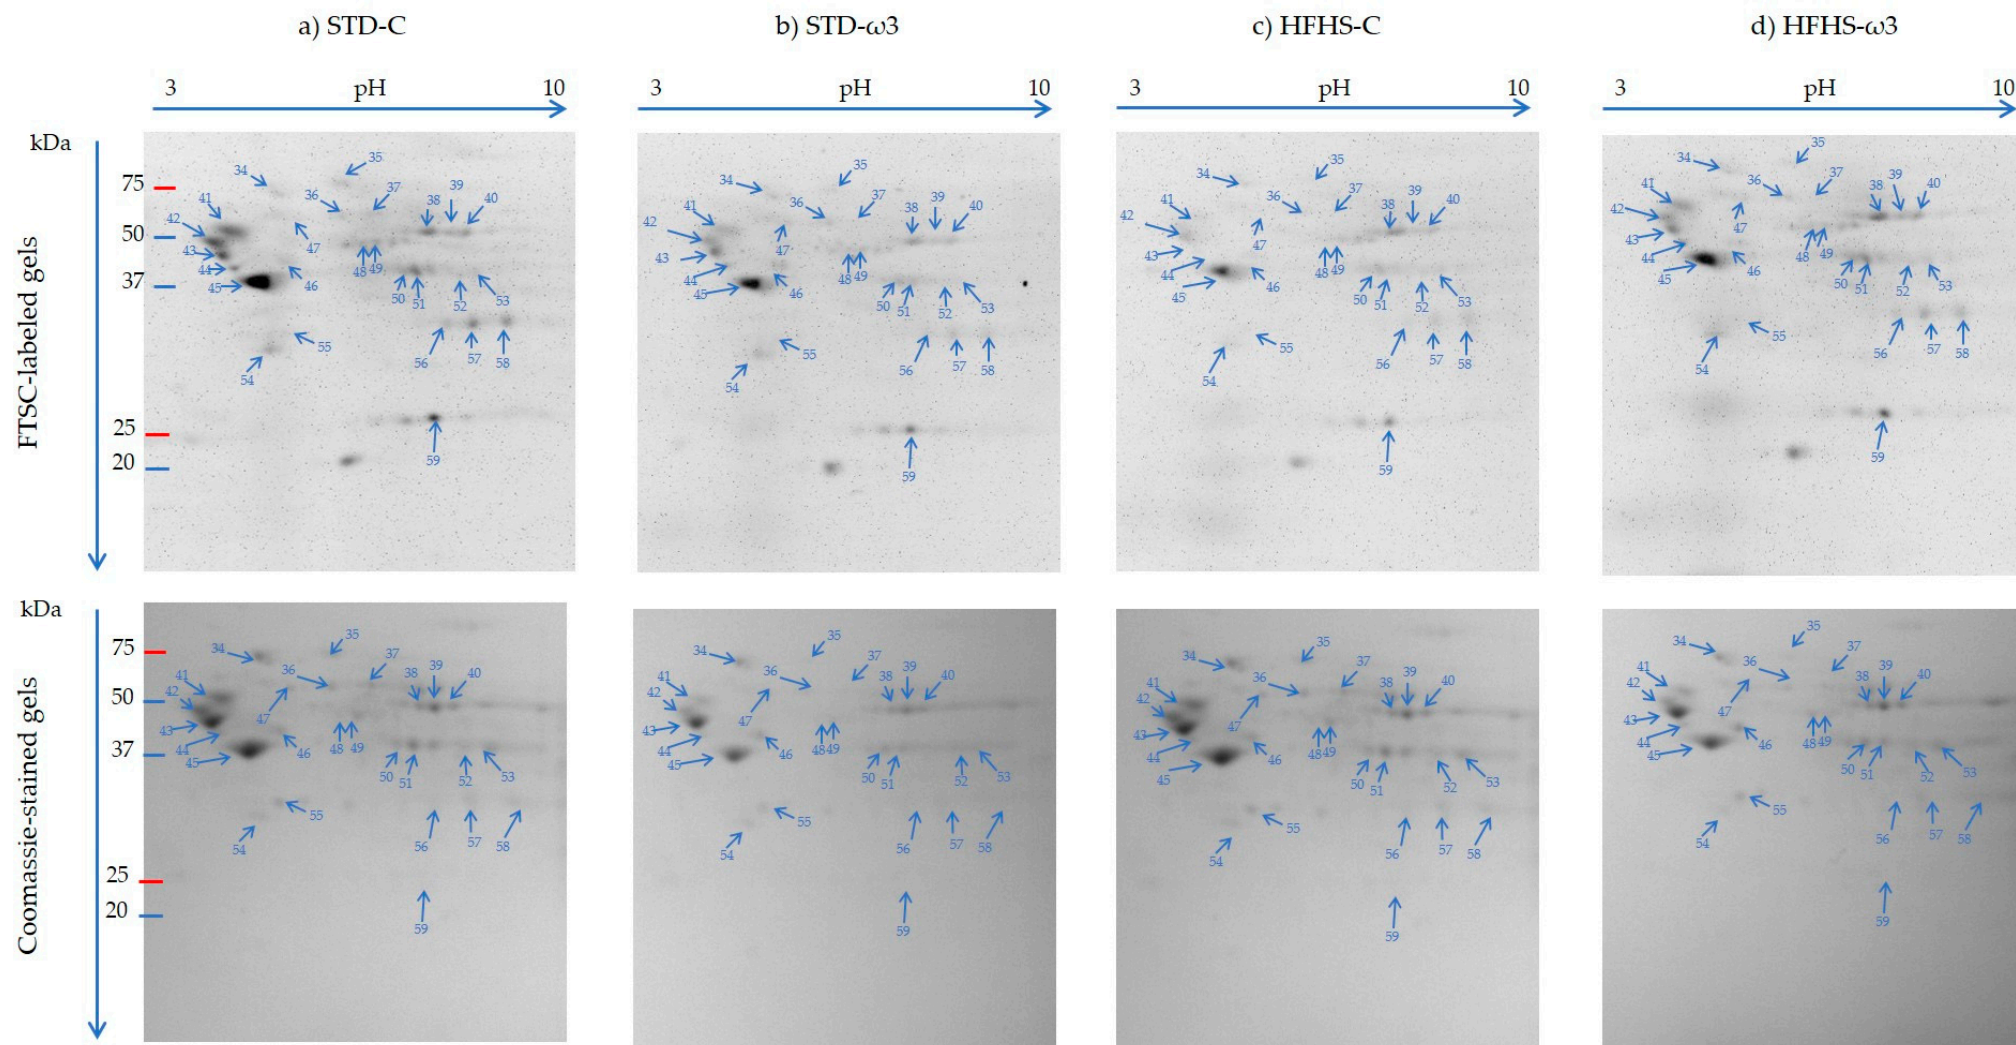

**Supplementary Figure S2:** Representative 2-DE gel images showing carbonylated and total proteins identified in the myofibrillar fraction of rat cerebellum. Upper panels are the FTSC-labeled 2-DE gel images and bottom panels are the corresponding Coomassie-stained 2-DE gel images from a) STD-C, b) STD- $\omega$ 3, c) HFHS-C and d) HFHS- $\omega$ 3 experimental groups. Numbered protein spots (34-59) indicate carbonylated proteins confidently identified and listed in Supplementary Table S4. Images are representatives of three independent labeling experiments performed in triplicates. STD: standard diet. HFHS: high-fat and high-sucrose diet; C: control oil (soybean oil),  $\omega$ 3: fish oil.
