# Supplementary material for: Dietary Marine Oils Selectively Decrease Obesogenic Diet-Derived Carbonylation in Proteins Involved in ATP Homeostasis and Glutamate Metabolism in the Rat Cerebellum
Source: MDPI journal article supplement (doi:10.3390/antiox13010103), 2024-01-15
Supplement: s1 [file s1]

**Table S1:** Diet composition.

|                                        | STD-C/- $\omega$ 3 <sup>a*</sup> | HFHS-C/- $\omega$ 3 <sup>b*</sup> |
|----------------------------------------|----------------------------------|-----------------------------------|
| <b>Protein (%)</b>                     | 14.3                             | 17.3                              |
| <b>Fat (%)</b>                         | 4.0                              | 23.2                              |
| <b>Anhydrous Milkfat (%)</b>           |                                  | 21                                |
| <b>Carbohydrate (available) (%)</b>    | 48.0                             | 47.6                              |
| <b>Sucrose (%)</b>                     | -                                | 34                                |
| <b>Fiber (%)</b>                       | 22.1                             | 5                                 |
| <b>Minerals (%)</b>                    | 4.7 <sup>c</sup>                 | 4.3 <sup>d</sup>                  |
| <b>Vitamins (%)</b>                    | 1.2 <sup>e</sup>                 | 1.9 <sup>f</sup>                  |
| <b>Total energy density (kcal/g)</b>   | 2.9                              | 4.7                               |
| <b>Calories from Protein (%)</b>       | 20                               | 14.7                              |
| <b>Calories from Fat (%)</b>           | 13                               | 44.6                              |
| <b>Calories from Carbohydrates (%)</b> | 67                               | 40.7                              |

<sup>a</sup>Teklad Global 14% Protein Rodent Maintenance Diet (Envigo, IN, USA).

<sup>b</sup>TD.08811 45% Kcal Fat Diet (Envigo, IN, USA).

<sup>c</sup>Calcium (0.7%), phosphorus (0.6%), non-phytate phosphorus (0.3%), sodium (0.1%), potassium (0.6%), chloride (0.3%), magnesium (0.2%), zinc (70 mg/kg), manganese (100 mg/kg), copper (15 mg/kg), iodine (6 mg/kg), iron (175 mg/kg), selenium (0.23 mg/kg).

<sup>d</sup>43 g/kg chow of Mineral Mix, AIN-93G-MX (94046): Calcium Carbonate (35.7%), monopotassium phosphate (19.6%), potassium citrate monohydrate (7.1%), sodium chloride (7.4%), potassium sulfate (4.7%), magnesium oxide (2.4%), ferric citrate (0.6%), zinc carbonate (0.2%), manganese carbonate (0.06%), copper carbonate (0.03%), potassium iodate (0.001%), sodium selenate anhydrous (0.001%), ammonium molybdate.4H<sub>2</sub>O (0.0008%), sodium metasilicate.9H<sub>2</sub>O (0.15%), chromium potassium sulfate.12H<sub>2</sub>O (0.3%), lithium chloride (0.002%), boric acid (0.008%), sodium fluoride (0.006%), nickel carbonate (0.003%), ammonium vanadate (0.0007%), powdered sugar (22.1%).

<sup>e</sup>Vitamin A (17 IU/g), vitamin D3 (1.2 IU/g), vitamin E (150 IU/kg), vitamin K3 (menadione; 58 mg/kg), vitamin B1 (thiamin; 64 mg/kg), vitamin B2 (riboflavin; 16 mg/kg), niacin (nicotinic acid; 84 mg/kg), vitamin B6 (pyridoxine; 17 mg/kg), pantothenic acid (76 mg/kg), vitamin B12 (cyanocobalamin, 0.09 mg/kg), biotin (0.57 mg/kg), folate (5 mg/kg), choline (1030 mg/kg).

<sup>f</sup>3 g/kg choline bitartrate + 19 g/kg chow of Vitamin Mix, AIN-93-VX (94047): nicotinic acid (0.3%), D-calcium pantothenate (0.16%), pyridoxine HCl (0.07%), thiamine HCl (0.06%), riboflavin (0.06%), folic acid (0.02%), D-biotin (0.002%), vitamin B12 (0.01% triturated in mannitol) (0.25%),  $\alpha$ -tocopherol powder (250 U/g; 3%), vitamin A palmitate (250,000 U/g; 0.16%), vitamin D3 (400,000 U/g; 0.025%), phyloquinone (0.0075%), powdered sucrose (95.97%).

\*STD-C and HFHS-C groups received a weekly oral dose of 0.8 ml/kg body weight of soybean oil; STD- $\omega$ 3 and HFHS- $\omega$ 3 groups received a weekly oral dose of 0.8 ml/kg body weight of fish oil.

**Table S2:** Fatty acid composition of each diet.

| Fatty acid*                       | STD-C <sup>a</sup> | STD- $\omega$ 3 <sup>b</sup> | HFHS-C <sup>a</sup> | HFHS- $\omega$ 3 <sup>b</sup> |
|-----------------------------------|--------------------|------------------------------|---------------------|-------------------------------|
| 14:0                              | 0.0                | 0.1                          | 11.5                | 11.6                          |
| 16:0                              | 14.8               | 14.6                         | 32.2                | 32.0                          |
| 16:1 $\omega$ 7                   | 0.0                | 0.1                          | 1.7                 | 1.7                           |
| 18:00                             | 2.9                | 2.9                          | 13.7                | 13.7                          |
| 18:1 $\omega$ 9                   | 20.5               | 20.3                         | 26.4                | 26.2                          |
| 18:1 $\omega$ 7                   | 0.0                | 0.0                          | 0.7                 | 0.7                           |
| 18:2 $\omega$ 6                   | 58.6               | 57.8                         | 9.7                 | 8.7                           |
| 20:0                              | n.d.               | 0.0                          | n.d.                | 0.0                           |
| 18:3 $\omega$ 3                   | 2.9                | 2.9                          | 1.1                 | 1.1                           |
| 20:1 $\omega$ 9                   | 0.0                | 0.0                          | 0.0                 | 0.0                           |
| 18:4 $\omega$ 3                   | 0.0                | 0.0                          | 0.0                 | 0.0                           |
| 20:2 $\omega$ 6                   | 0.0                | 0.0                          | 0.0                 | 0.0                           |
| 20:3 $\omega$ 6                   | n.d.               | 0.0                          | n.d.                | 0.0                           |
| 20:4 $\omega$ 6                   | 0.0                | 0.0                          | 0.0                 | 0.0                           |
| 22:1 $\omega$ 11                  | 0.0                | 0.0                          | 0.0                 | 0.0                           |
| 22:1 $\omega$ 9                   | 0.0                | 0.0                          | 0.0                 | 0.0                           |
| 20:4 $\omega$ 3                   | 0.0                | 0.0                          | 0.0                 | 0.0                           |
| 20:5 $\omega$ 3                   | 0.0                | 0.4                          | 0.0                 | 0.5                           |
| 24:1 $\omega$ 9                   | 0.0                | 0.0                          | 0.0                 | 0.0                           |
| 22:5 $\omega$ 3                   | 0.0                | 0.1                          | 0.0                 | 0.1                           |
| 22:6 $\omega$ 3                   | 0.0                | 0.4                          | 0.0                 | 0.6                           |
| <b>Total SFAs</b>                 | <b>17.5</b>        | <b>18.3</b>                  | <b>59.4</b>         | <b>60.5</b>                   |
| <b>Total MUFAs</b>                | <b>21.1</b>        | <b>20.3</b>                  | <b>29.3</b>         | <b>28.4</b>                   |
| <b>Total PUFAs</b>                | <b>61.1</b>        | <b>61.0</b>                  | <b>10.8</b>         | <b>10.7</b>                   |
| <b>Total <math>\omega</math>3</b> | <b>3.3</b>         | <b>3.2</b>                   | <b>1.6</b>          | <b>1.4</b>                    |
| <b>Total <math>\omega</math>6</b> | <b>58.8</b>        | <b>58.9</b>                  | <b>10.4</b>         | <b>10.6</b>                   |

\*Results are expressed as a percentage of total fatty acids (mg/100mg of Total FA).

<sup>a</sup>STD-C and HFHS-C groups received a weekly oral dose of 0.8 ml/kg body weight of soybean oil.

<sup>b</sup>STD- $\omega$ 3 and HFHS-  $\omega$ 3 groups received a weekly oral dose of 0.8 ml/kg body weight of fish oil.

**Table S3.** Biometrical and biochemical data from Sprague-Dawley rats fed either a standard diet (STD) or a high-fat and high-sucrose diet (HFHS). Control groups (STD-C and HFHS-C) were supplemented with soybean oil.  $\omega$ 3 groups (STD- $\omega$ 3 and HFHS- $\omega$ 3) were supplemented with fish oil.<sup>1,2</sup>

|                                                                  | STD-C                      | STD- $\omega$ 3             | HFHS-C                     | HFHS- $\omega$ 3            |
|------------------------------------------------------------------|----------------------------|-----------------------------|----------------------------|-----------------------------|
|                                                                  | Mean (SD)                  | Mean (SD)                   | Mean (SD)                  | Mean (SD)                   |
| % of initial body Weight <sup>z*</sup>                           | 114.07 <sup>a</sup> (2.46) | 115.47 <sup>ab</sup> (3.27) | 118.43 <sup>b</sup> (3.69) | 115.90 <sup>ab</sup> (3.69) |
| Adiposity Index (%) <sup>*</sup>                                 | 1.67 <sup>a</sup> (0.44)   | 1.65 <sup>a</sup> (0.38)    | 2.37 <sup>b</sup> (0.75)   | 2.32 <sup>b</sup> (0.69)    |
| % Fat in liver <sup>y*</sup>                                     | 7.01 <sup>a</sup> (0.51)   | 6.36 <sup>b</sup> (0.28)    | 7.34 <sup>a</sup> (0.45)   | 6.55 <sup>b</sup> (0.38)    |
| % Fat in kidney <sup>y*</sup>                                    | 4.31 <sup>a</sup> (0.23)   | 4.11 <sup>ab</sup> (0.24)   | 5.65 <sup>a</sup> (0.56)   | 4.39 <sup>b</sup> (0.39)    |
| % Fat in adipose tissue <sup>y*</sup>                            | 96.32 <sup>a</sup> (2.05)  | 92.73 <sup>b</sup> (3.16)   | 99.51 <sup>a</sup> (2.03)  | 97.01 <sup>b</sup> (1.20)   |
| Plasma Insulin ng/mL <sup>*</sup>                                | 0.56 <sup>a</sup> (0.32)   | 0.65 <sup>a</sup> (0.19)    | 1.81 <sup>b</sup> (0.82)   | 1.46 <sup>b</sup> (0.72)    |
| Plasma Glucose mg/mL <sup>*</sup>                                | 63.00 <sup>a</sup> (4.84)  | 63.44 <sup>a</sup> (4.1)    | 70.78 <sup>a</sup> (4.99)  | 71.33 <sup>a</sup> (5.32)   |
| GPx activity (U/g Hb)                                            | 85.41 <sup>a</sup> (14.75) | 80.87 <sup>ab</sup> (19.18) | 83.45 <sup>a</sup> (13.06) | 71.34 <sup>b</sup> (6.82)   |
| GSSG/GSH in erythrocyte <sup>x*§</sup>                           | 0.60 <sup>a</sup> (0.25)   | 1.07 <sup>b</sup> (0.34)    | 1.48 <sup>b</sup> (1.09)   | 1.56 <sup>b</sup> (0.87)    |
| Lipid peroxidation (mmol hydroperoxides/mL plasma) <sup>x*</sup> | 0.13 <sup>a</sup> (0.03)   | 0.13 <sup>a</sup> (0.02)    | 0.21 <sup>a</sup> (0.06)   | 0.14 <sup>a</sup> (0.02)    |
| Plasma ORAC ( $\mu$ mol Trolox equivalents/mL) <sup>§</sup>      | 18.33 <sup>a</sup> (3.76)  | 19.12 <sup>a</sup> (2.64)   | 17.41 <sup>a</sup> (4.71)  | 21.18 <sup>a</sup> (6.12)   |
| Plasma albumin carbonylation index <sup>x§</sup>                 | 0.41 <sup>ab</sup> (0.04)  | 0.33 <sup>ab</sup> (0.05)   | 0.43 <sup>a</sup> (0.11)   | 0.32 <sup>b</sup> (0.04)    |
| Liver carbonylation index <sup>x*§</sup>                         | 0.27 <sup>a</sup> (0.02)   | 0.32 <sup>b</sup> (0.03)    | 0.45 <sup>c</sup> (0.03)   | 0.28 <sup>a</sup> (0.03)    |
| Kidney carbonylation index <sup>x*§</sup>                        | 0.24 <sup>a</sup> (0.01)   | 0.30 <sup>b</sup> (0.02)    | 0.43 <sup>c</sup> (0.04)   | 0.30 <sup>a</sup> (0.03)    |

<sup>1</sup>Two-way ANOVA analyses were conducted. \* p<0.05 significant differences given by the factor “diet” (STD and HFHS); § p<0.05 significant differences given by the factor “supplement” (CONTROL,  $\omega$ -3). Superscript # indicates significant interaction (p<0.05) between the factors diet and supplement. Means with different superscript indicate significant differences (p<0.05) (analyzed by post-hoc Tukey HSD).

<sup>z</sup>A percentage of the initial body weight during the course of the experiment. Body weight percentage was calculated as (final body weight/initial body weight)  $\times$  100.

<sup>y</sup>Adiposity index: (total abdominal fat $\times$ 100)/body weight.

ORAC: oxygen radical absorbance capacity. GPx: Glutathione peroxidase. GSSG/GSH: oxidized/reduced glutathione ratio.

<sup>2</sup> Parameters in the table are already published in:

Dasilva, G; Lois, S; Méndez, L; Miralles-Pérez, B; Romeu, M; Ramos-Romero, S; Torres, J.L.; Medina, I. Fish Oil Improves Pathway-Oriented Profiling of Lipid Mediators for Maintaining Metabolic Homeostasis in Adipose Tissue of Prediabetic Rats, *Front. Immunol.* 12 (2021) 8848161. <https://doi.org/10.3389/fimmu.2021.608875>.

Méndez, L; Muñoz, S; Barros, L; Miralles-Pérez, B; Romeu, M; Ramos-Romero, S; Torres, J.L.; Medina, I. Combined Intake of Fish Oil and D-Fagomine Prevents High-Fat High-Sucrose Diet-Induced Prediabetes by Modulating Lipotoxicity and Protein Carbonylation in the Kidney, *Antioxidants*. 12 (2023) 751. <https://doi.org/10.3390/antiox12030751>.

Hereu, M; Ramos-Romero, S; Busquets, C; Atienza, L; Amézqueta, S; Miralles-Pérez, B; Nogués, M.R; Méndez, L; Medina, I; Torres, J.L. Effects of combined d-fagomine and omega-3 PUFAs on gut microbiota subpopulations and diabetes risk factors in rats fed a high-fat diet. *Sci. Rep.* 2019, 9, 16628. <https://doi.org/10.1038/s41598-019-52678-5>

Hereu, M; Ramos-Romero, S; García-González, N; Amézqueta, S; Torres, J.L. Eubiotic effect of buckwheat d-fagomine in healthy rats. *J. Funct. Foods* 2018, 50, 120–126. <https://doi.org/10.1016/j.jff.2018.09.018>

Hereu, M; Ramos-Romero, S; Marín-Valls, R; Amézqueta, S; Miralles-Pérez, B; Romeu, M; Méndez, L; Medina, I; Torres, J.L. Combined Buckwheat d-Fagomine and Fish Omega-3 PUFAs Stabilize the Populations of Gut Prevotella and Bacteroides While Reducing Weight Gain in Rats. *Nutrients* 2019, 11, 2606. <https://doi.org/10.3390/nu11112606>

Miralles-Pérez, B; Nogués, M.R.; Sánchez-Martos, V.; Taltavull, N.; Méndez, L.; Medina, I.; Ramos-Romero, S.; Torres, J.L.; Romeu, M. The Effects of the Combination of Buckwheat D-Fagomine and Fish Omega-3 Fatty Acids on Oxidative Stress and Related Risk Factors in Pre-Obese Rats. *Foods* 2021, 10, 332. <https://doi.org/10.3390/foods10020332>

Moreno, F.; Méndez, L.; Raner, A.; Miralles-Pérez, B.; Romeu, M.; Ramos-Romero, S.; Torres, J.L.; Medina, I. Fish Oil Supplementation Counteracts the Effect of High-Fat and High-Sucrose Diets on the Carbonylated Proteome in the Rat Cerebral Cortex. *Biomed. Pharmacother.* 2023, 168, 115708. <https://doi.org/10.1016/j.biopha.2023.115708>
