# Supplementary material for: Dietary Marine Oils Selectively Decrease Obesogenic Diet-Derived Carbonylation in Proteins Involved in ATP Homeostasis and Glutamate Metabolism in the Rat Cerebellum
Source: Antioxidants (Basel). 2024 Jan 15;13(1):103. doi: 10.3390/antiox13010103 (PMC10812471; doi:10.3390/antiox13010103)
Supplement: Supplementary file 1 [file antioxidants-13-00103-s001.zip › Supplementary Table S4.xlsx]

## Sheet: Supplementary Table S4
Supplementary Table S4. Carbonylated protein identified in rat cerebellum. Nº Spot column numbers are referred to the numbered spots in Figures S1 and S2 (pointed out in column "Figure"). Two-way ANOVA analyses were conducted. * p<0.05 significant differences given by the factor “diet” (STD and HFHS); $ p<0.05 significant differences given by the factor “supplement” (CONTROL, ω-3). Superscript # …
Spot Nº	Figure	Name	Gene name	Accession	Coverage	Peptides	Unique Peptides	Avg. Mass	TWO-WAY ANOVA	STD-C	STD-ω3	HFHS-C	HFHS-ω3
1	S1	Heat shock cognate 71 kDa protein OS=Rattus norvegicus OX=10116 GN=Hspa8 PE=1 SV=1	Hspa8	P63018	59	47	33	70871		0.045a±0.027	0.044a±0.024	0.056a±0.020	0.077a±0.015
2	S1	Dihydropyrimidinase-related protein 2 OS=Rattus norvegicus OX=10116 GN=Dpysl2 PE=1 SV=1	Dpysl2	P47942	60	41	31	62278		0.064a±0.015	0.091a±0.044	0.095a±0.030	0.112a±0.039
3	S1	Albumin OS=Rattus norvegicus OX=10116 GN=Alb PE=1 SV=2	Alb	P02770	32	19	19	68731		0.090a±0.047	0.140a±0.049	0.109a±0.012	0.124a±0.031
4	S1	Pyruvate kinase PKM OS=Rattus norvegicus OX=10116 GN=Pkm PE=1 SV=3	Pkm	P11980	42	23	23	57818		0.055a±0.039	0.063a±0.022	0.077a±0.029	0.079a±0.017
5	S1	Pyruvate kinase PKM OS=Rattus norvegicus OX=10116 GN=Pkm PE=1 SV=3	Pkm	P11980	62	46	46	57818		0.037a±0.022	0.039a±0.015	0.050a±0.011	0.037a±0.015
6	S1	Gamma-enolase OS=Rattus norvegicus OX=10116 GN=Eno2 PE=1 SV=2	Eno2	P07323	72	45	32	47141		0.084a±0.022	0.083a±0.039	0.065a±0.023	0.110a±0.030
7	S1	Actin cytoplasmic 2 OS=Rattus norvegicus OX=10116 GN=Actg1 PE=1 SV=1	Actg1	P63259	73	51	29	41793		0.1a±0.045	0.207a±0.107	0.187a±0.045	0.206a±0.021
8	S1	Creatine kinase B-type OS=Rattus norvegicus OX=10116 GN=Ckb PE=1 SV=2	Ckb	P07335	80	52	45	42725	*	0.053a±0.015	0.065a±0.011	0.123a±0.082	0.112a±0.035
9	S1	Alpha-enolase OS=Rattus norvegicus OX=10116 GN=Eno1 PE=1 SV=4	Eno1	P04764	51	27	18	47128		0.052a±0.022	0.084a±0.042	0.07a±0.020	0.075a±0.013
10	S1	Alpha-enolase OS=Rattus norvegicus OX=10116 GN=Eno1 PE=1 SV=4	Eno1	P04764	59	37	30	47128	*$	0.021a±0.003	0.038a±0.015	0.039a±0.005	0.051a±0.011
11	S1	Glutamine synthetase OS=Rattus norvegicus OX=10116 GN=Glul PE=1 SV=3	Glul	P09606	26	11	11	42268		0.109a±0.078	0.106a±0.042	0.100a±0.073	0.103a±0.048
	S1	Isocitrate dehydrogenase [NADP] cytoplasmic OS=Rattus norvegicus OX=10116 GN=Idh1 PE=1 SV=1	Idh1	P41562	25	13	12	46734		0.109a±0.078	0.106a±0.042	0.100a±0.073	0.103a±0.048
	S1	Pyruvate dehydrogenase E1 component subunit alpha somatic form mitochondrial OS=Rattus norvegicus OX=10116 GN=Pdha1 PE=1 SV=2	Pdha1	P26284	17	7	7	43227		0.109a±0.078	0.106a±0.042	0.100a±0.073	0.103a±0.048
12	S1	Aspartate aminotransferase cytoplasmic OS=Rattus norvegicus OX=10116 GN=Got1 PE=1 SV=3	Got1	P13221	48	23	23	46429		0.053a±0.023	0.080a±0.016	0.065a±0.021	0.066a±0.026
13	S1	Fructose-bisphosphate aldolase C OS=Rattus norvegicus OX=10116 GN=Aldoc PE=1 SV=3	Aldoc	P09117	64	30	28	39284		0.054a	0.059a	0.076a	0.066a
14	S1	Fructose-bisphosphate aldolase C OS=Rattus norvegicus OX=10116 GN=Aldoc PE=1 SV=3	Aldoc	P09117	54	22	20	39284		0.133a±0.104	0.075a±0.034	0.129a±0.021	0.087a±0.020
	S1	Fructose-bisphosphate aldolase A OS=Rattus norvegicus OX=10116 GN=Aldoa PE=1 SV=2	Aldoa	P05065	34	16	14	39352		0.133a±0.104	0.075a±0.034	0.129a±0.021	0.087a±0.020
15	S1	Aspartate aminotransferase cytoplasmic OS=Rattus norvegicus OX=10116 GN=Got1 PE=1 SV=3	Got1	P13221	42	20	20	46429		0.126a±0.074	0.131a±0.068	0.158a±0.023	0.159a±0.104
	S1	Fructose-bisphosphate aldolase C OS=Rattus norvegicus OX=10116 GN=Aldoc PE=1 SV=3	Aldoc	P09117	37	18	17	39284		0.126a±0.074	0.131a±0.068	0.158a±0.023	0.159a±0.104
16	S1	Fructose-bisphosphate aldolase C OS=Rattus norvegicus OX=10116 GN=Aldoc PE=1 SV=3	Aldoc	P09117	20	7	7	39284		0.090a±0.050	0.104a±0.037	0.121a±0.020	0.109a±0.016
17	S1	Fructose-bisphosphate aldolase C OS=Rattus norvegicus OX=10116 GN=Aldoc PE=1 SV=3	Aldoc	P09117	62	38	36	39284		0.049a±0.019	0.057a±0.016	0.067a±0.030	0.063±0.005
18	S1	Synapsin-1 OS=Rattus norvegicus OX=10116 GN=Syn1 PE=1 SV=3	Syn1	P51635	31	10	10	36506		0.304a±0.088	0.089b±0.029	0.161ab±0.022	0.127b±0.066
	S1	Aldo-keto reductase family 1 member A1 OS=Rattus norvegicus OX=10116 GN=Akr1a1 PE=1 SV=2	Akr1a1	P09951	10	6	4	73988	$#	0.304a±0.088	0.089b±0.029	0.161ab±0.022	0.127b±0.066
19	S1	Glyceraldehyde-3-phosphate dehydrogenase OS=Rattus norvegicus OX=10116 GN=Gapdh PE=1 SV=3	Gapdh	P04797	38	17	13	35828	$	0.312a±0.008	0.150b±0.072	0.297a±0.051	0.131b±0.038
20	S1	L-lactate dehydrogenase B chain OS=Rattus norvegicus OX=10116 GN=Ldhb PE=1 SV=2	Ldhb	P42123	59	29	25	36612		0.042a±0.017	0.100a±0.043	0.085a±0.011	0.099a±0.033
21	S1	L-lactate dehydrogenase B chain OS=Rattus norvegicus OX=10116 GN=Ldhb PE=1 SV=2	Ldhb	P42123	33	14	14	36612		0.055a±0.011	0.075a±0.028	0.075a±0.024	0.091a±0.026
22	S1	Calbindin OS=Rattus norvegicus OX=10116 GN=Calb1 PE=1 SV=2	Calb1	P07171	30	11	11	29994		n.q.	n.q.	n.q.	n.q.
23	S1	Ubiquitin carboxyl-terminal hydrolase isozyme L1 OS=Rattus norvegicus OX=10116 GN=Uchl1 PE=1 SV=2	Uchl1	Q00981	56	12	12	24838		n.q.	n.q.	n.q.	n.q.
24	S1	Rho GDP-dissociation inhibitor 1 OS=Rattus norvegicus OX=10116 GN=Arhgdia PE=1 SV=1	Arhgdia	Q5XI73	28	7	7	23407		n.q.	n.q.	n.q.	n.q.
25	S1	Transforming protein RhoA OS=Rattus norvegicus OX=10116 GN=Rhoa PE=1 SV=1	Rhoa	P61589	31	6	6	21782		n.q.	n.q.	n.q.	n.q.
26	S1	Triosephosphate isomerase OS=Rattus norvegicus OX=10116 GN=Tpi1 PE=1 SV=2	Tpi1	P48500	22	6	6	26849		0.109a±0.066	0.154a±0.002	0.143a±0.029	0.167a±0.087
27	S1	Triosephosphate isomerase OS=Rattus norvegicus OX=10116 GN=Tpi1 PE=1 SV=2	Tpi1	P48500	22	5	5	26849		0.371a±0.232	0.376a±0.106	0.435a±0.053	0.277a±0.113
28	S1	Phosphoglycerate mutase 1 OS=Rattus norvegicus OX=10116 GN=Pgam1 PE=1 SV=4	Pgam1	P25113	63	20	12	28832		0.723a±0.460	0.710a±0.226	0.856a±0.075	0.509a±0.126
29	S1	Carbonic anhydrase 2 OS=Rattus norvegicus OX=10116 GN=Ca2 PE=1 SV=2	Ca2	P27139	20	7	7	29114	*	0.161a±0.058	0.150a±0.040	0.264a±0.084	0.211a±0.014
	S1	Fructose-bisphosphate aldolase C OS=Rattus norvegicus OX=10116 GN=Aldoc PE=1 SV=3	Aldoc	P09117	30	8	8	39284		0.161a±0.058	0.150a±0.040	0.264a±0.084	0.211a±0.014
	S1	Phosphoglycerate mutase 1 OS=Rattus norvegicus OX=10116 GN=Pgam1 PE=1 SV=4	Pgam1	P25113	30	7	7	28832		0.161a±0.058	0.150a±0.040	0.264a±0.084	0.211a±0.014
30	S1	Nucleoside diphosphate kinase B OS=Rattus norvegicus OX=10116 GN=Nme2 PE=1 SV=1	Nme2	P19804	61	10	10	17283		n.q.	n.q.	n.q.	n.q.
31	S1	Nucleoside diphosphate kinase B OS=Rattus norvegicus OX=10116 GN=Nme2 PE=1 SV=1	Nme2	P19804	47	6	6	17283		n.q.	n.q.	n.q.	n.q.
	S1	Peptidyl-prolyl cis-trans isomerase A OS=Rattus norvegicus OX=10116 GN=Ppia PE=1 SV=2	Ppia	P10111	18	3	3	17874		n.q.	n.q.	n.q.	n.q.
32	S1	Peptidyl-prolyl cis-trans isomerase A OS=Rattus norvegicus OX=10116 GN=Ppia PE=1 SV=2	Ppia	P10111	18	3	3	17874		n.q.	n.q.	n.q.	n.q.
33	S1	Peptidyl-prolyl cis-trans isomerase A OS=Rattus norvegicus OX=10116 GN=Ppia PE=1 SV=2	Ppia	P10111	30	6	6	17874		n.q.	n.q.	n.q.	n.q.
34	S2	Heat shock cognate 71 kDa protein OS=Rattus norvegicus OX=10116 GN=Hspa8 PE=1 SV=1	Hspa8	P63018	39	27	19	70871		0.117a±0.019	0.134a±0.056	0.182a±0.077	0.183a±0.060
35	S2	Albumin OS=Rattus norvegicus OX=10116 GN=Alb PE=1 SV=2	Alb	P02770	27	17	17	68731		0.102a±0.087	0.145a±0.015	0.206a±0.150	0.061a±0.037
36	S2	ATP synthase subunit beta mitochondrial OS=Rattus norvegicus OX=10116 GN=Atp5f1b PE=1 SV=2	Atp5f1b	P10719	36	13	13	56354		0.089a±0.067	0.158a±0.063	0.218a±0.027	0.203a±0.092
37	S2	Syntaxin-binding protein 1 OS=Rattus norvegicus OX=10116 GN=Stxbp1 PE=1 SV=1	Stxbp1	P61765	18	11	11	67569		0.125a±0.061	0.097a±0.047	0.111a±0.054	0.066a±0.018
	S2	Stress-induced-phosphoprotein 1 OS=Rattus norvegicus OX=10116 GN=Stip1 PE=1 SV=1	Stip1	O35814	15	10	10	62570		0.125a±0.061	0.097a±0.047	0.111a±0.054	0.066a±0.018
38	S2	Glutamate dehydrogenase 1 mitochondrial OS=Rattus norvegicus OX=10116 GN=Glud1 PE=1 SV=2	Glud1	P10860	41	22	22	61416	$	0.455a±0.132	0.288a±0.075	0.449a±0.091	0.286a±0.073
39	S2	Glutamate dehydrogenase 1 mitochondrial OS=Rattus norvegicus OX=10116 GN=Glud1 PE=1 SV=2	Glud1	P10860	45	31	31	61416		0.126a±0.041	0.095a±0.018	0.177a±0.051	0.135a±0.081
40	S2	Glutamate dehydrogenase 1 mitochondrial OS=Rattus norvegicus OX=10116 GN=Glud1 PE=1 SV=2	Glud1	P10860	35	20	20	61416	$	0.239a±0.120	0.126a±0.022	0.185a±0.032	0.125a±0.027
41	S2	Neurofilament light polypeptide OS=Rattus norvegicus OX=10116 GN=Nefl PE=1 SV=3	Nefl	P19527	17	9	8	61335	#	0.199a±0.068	0.485b±0.129	0.311ab±118	0.254ab±0.042
	S2	Protein kinase C and casein kinase substrate in neurons protein 1 OS=Rattus norvegicus OX=10116 GN=Pacsin1 PE=1 SV=1	Pacsin1	Q9Z0W5	10	5	5	50449		0.199a±0.068	0.485b±0.129	0.311ab±118	0.254ab±0.042
42	S2	ATP synthase subunit beta mitochondrial OS=Rattus norvegicus OX=10116 GN=Atp5f1b PE=1 SV=2	Atp5f1b	P10719	26	11	11	56354		0.280a±0.116	0.270a±0.012	0.203a±0.065	0.341a±0.089
43	S2	ATP synthase subunit beta mitochondrial OS=Rattus norvegicus OX=10116 GN=Atp5f1b PE=1 SV=2	Atp5f1b	P10719	63	43	43	56354	*	0.053a±0.024	0.074a±0.007	0.109a±0.037	0.172a±0.089
44	S2	ATP synthase subunit beta mitochondrial OS=Rattus norvegicus OX=10116 GN=Atp5f1b PE=1 SV=2	Atp5f1b	P10719	67	56	56	56354		0.191a±0.100	0.229a±0.060	0.219a±0.017	0.323a±0.062
45	S2	Actin cytoplasmic 1 OS=Rattus norvegicus OX=10116 GN=Actb PE=1 SV=1	Actb	P60711	67	49	23	41737	$	0.141a±0.063	0.221a±0.060	0.137a±0.076	0.282a±0.054
46	S2	Cytochrome b-c1 complex subunit 1, mitochondrial OS=Rattus norvegicus OX=10116 GN=Uqcrc1 PE=1 SV=1	Uqcrc1	Q68FY0	17	10	10	52849		0.181a±0.142	0.300a±0.140	0.178a±0.075	0.091a±0.007
47	S2	Heat shock cognate 71 kDa protein OS=Rattus norvegicus OX=10116 GN=Hspa8 PE=1 SV=1	Hspa8	P63018	18	9	9	70871		0.119a±0.048	0.141a±0.018	0.125a±0.042	0.104a±0.019
	S2	Dihydropyrimidinase-related protein 2 OS=Rattus norvegicus OX=10116 GN=Dpysl2 PE=1 SV=1	Dpysl2	P47942	28	16	16	62278		0.119a±0.048	0.141a±0.018	0.125a±0.042	0.104a±0.019
48	S2	ATP synthase subunit beta mitochondrial OS=Rattus norvegicus OX=10116 GN=Atp5f1b PE=1 SV=2	Atp5f1b	P10719	29	11	11	56354	$	0.173ab±0.035	0.141ab±0.045	0.244a±0.061	0.122b±0.019
	S2	Septin-11 OS=Rattus norvegicus OX=10116 GN=Septin11 PE=1 SV=1	Septin11	B3GNI6	23	10	10	49695		0.173ab±0.035	0.141ab±0.045	0.244a±0.061	0.122b±0.019
49	S2	Septin-11 OS=Rattus norvegicus OX=10116 GN=Septin11 PE=1 SV=1	Septin11	B3GNI6	22	10	10	49695		0.125a±0.033	0.111a±0.010	0.178a±0.070	0.135a±0.037
	S2	Alpha-enolase OS=Rattus norvegicus OX=10116 GN=Eno1 PE=1 SV=4	Eno1	P04764	32	16	11	47128		0.125a±0.033	0.111a±0.010	0.178a±0.070	0.135a±0.037
50	S2	Glutamine synthetase OS=Rattus norvegicus OX=10116 GN=Glul PE=1 SV=3	Glul	P09606	25	11	11	42268	$	0.301ab±0.301	0.215ab±0.040	0.434b±0.094	0.209a±0.036
	S2	Creatine kinase B-type OS=Rattus norvegicus OX=10116 GN=Ckb PE=1 SV=2	Ckb	P07335	24	6	6	42725		0.301ab±0.301	0.215ab±0.040	0.434b±0.094	0.209a±0.036
	S2	Pyruvate dehydrogenase E1 component subunit alpha somatic form mitochondrial OS=Rattus norvegicus OX=10116 GN=Pdha1 PE=1 SV=2	Pdha1	P26284	22	9	9	43227		0.301ab±0.301	0.215ab±0.040	0.434b±0.094	0.209a±0.036
51	S2	Glutamine synthetase OS=Rattus norvegicus OX=10116 GN=Glul PE=1 SV=3	Glul	P09606	42	24	24	42268	$	0.151a±0.016	0.141a±0.055	0.265a±0.086	0.136a±0.012
	S2	Pyruvate dehydrogenase E1 component subunit alpha somatic form mitochondrial OS=Rattus norvegicus OX=10116 GN=Pdha1 PE=1 SV=2	Pdha1	P26284	25	12	12	43227		0.151a±0.016	0.141a±0.055	0.265a±0.086	0.136a±0.012
52	S2	Glutamine synthetase OS=Rattus norvegicus OX=10116 GN=Glul PE=1 SV=3	Glul	P09606	36	14	14	42268	$	0.157a±0.037	0.135a±0.041	0.210a±0.066	0.106a±0.025
	S2	Pyruvate dehydrogenase E1 component subunit alpha somatic form mitochondrial OS=Rattus norvegicus OX=10116 GN=Pdha1 PE=1 SV=2	Pdha1	P26284	45	19	19	43227		0.157a±0.037	0.135a±0.041	0.210a±0.066	0.106a±0.025
53	S2	Creatine kinase U-type, mitochondrial OS=Rattus norvegicus OX=10116 GN=Ckmt1 PE=1 SV=1	Ckmt1	P25809	29	14	12	47029	$#	0.081a±0.018	0.063a±0.006	0.139b±0.021	0.054a±0.022
54	S2	Creatine kinase B-type OS=Rattus norvegicus OX=10116 GN=Ckb PE=1 SV=2	Ckb	P07335	33	10	10	42725		0.163a±0.050	0.239a±0.053	0.221a±0.062	0.168a±0.043
	S2	Pyruvate dehydrogenase E1 component subunit beta mitochondrial OS=Rattus norvegicus OX=10116 GN=Pdhb PE=1 SV=2	Pdhb	P49432	30	12	12	38982		0.163a±0.050	0.239a±0.053	0.221a±0.062	0.168a±0.043
55	S2	Guanine nucleotide-binding protein G(I)/G(S)/G(T) subunit beta-2 OS=Rattus norvegicus OX=10116 GN=Gnb2 PE=1 SV=4	Gnb2	P54313	34	11	3	37331		0.105a±0.050	0.122a±0.045	0.137a±0.048	0.127a±0.056
	S2	L-lactate dehydrogenase B chain OS=Rattus norvegicus OX=10116 GN=Ldhb PE=1 SV=2	Ldhb	P42123	24	8	8	36612		0.105a±0.050	0.122a±0.045	0.137a±0.048	0.127a±0.056
56	S2	Actin cytoplasmic 2 OS=Rattus norvegicus OX=10116 GN=Actg1 PE=1 SV=1	Actg1	P63259	17	6	6	41793		0.442a±0.248	0.178a±0.081	0.285a±0.141	0.224a±0.108
	S2	Actin cytoplasmic 1 OS=Rattus norvegicus OX=10116 GN=Actb PE=1 SV=1	Actb	P60711	17	6	6	41737		0.442a±0.248	0.178a±0.081	0.285a±0.141	0.224a±0.108
57	S2	Glyceraldehyde-3-phosphate dehydrogenase OS=Rattus norvegicus OX=10116 GN=Gapdh PE=1 SV=3	Gapdh	P04797	22	10	7	35828	$	0.213a±0.062	0.118a±0.070	0.249a±0.049	0.150a±0.034
	S2	Synapsin-1 OS=Rattus norvegicus OX=10116 GN=Syn1 PE=1 SV=3	Syn1	P09951	3	3	3	73988		0.213a±0.062	0.118a±0.070	0.249a±0.049	0.150a±0.034
58	S2	Glyceraldehyde-3-phosphate dehydrogenase OS=Rattus norvegicus OX=10116 GN=Gapdh PE=1 SV=3	Gapdh	P04797	29	13	13	35828	$#	0.190a±0.028	0.049b±0.013	0.126ab±0.014	0.107b±0.054
59	S2	Phosphoglycerate mutase 1 OS=Rattus norvegicus OX=10116 GN=Pgam1 PE=1 SV=4	Pgam1	P25113	9	3	3	28832		n.q.	n.q.	n.q.	n.q.
	S2	Triosephosphate isomerase OS=Rattus norvegicus OX=10116 GN=Tpi1 PE=1 SV=2	Tpi1	P48500	37	8	8	26849		n.q.	n.q.	n.q.	n.q.
